## Cell-free DNA Profiling Informs Major Complications of Hematopoietic Cell Transplantation

Alexandre Pellan Cheng<sup>1</sup>, Matthew Pellan Cheng<sup>2,3</sup>, Conor James Loy<sup>4</sup>, Joan Sasing Lenz<sup>1</sup>, Kaiwen Chen<sup>2,3</sup>, Sami Smalling<sup>1</sup>, Philip Burnham<sup>5</sup>, Kaitlyn Marie Timblin<sup>2,3</sup>, José Luis Orejas<sup>2,3</sup>, Emily Silverman<sup>2,3</sup>, Paz Polak<sup>6,7</sup>, Francisco M. Marty<sup>3,8</sup>, Jerome Ritz<sup>2,8</sup>, Iwijn De Vlamincck<sup>1,\*</sup>

<sup>1</sup>Meinig School of Biomedical Engineering, Cornell University, Ithaca, NY, USA

<sup>2</sup>Department of Medical Oncology, Dana-Farber Cancer Institute, Boston, MA, USA

<sup>3</sup>Division of Infectious Disease, Brigham and Women's Hospital, Boston, MA, USA

<sup>4</sup>Department of Molecular Biology and Genetics, Cornell University, Ithaca, NY, USA

<sup>5</sup>Department of Bioengineering, University of Pennsylvania, Philadelphia, PA, USA

<sup>6</sup>Department of Oncological Sciences, Icahn School of Medicine at Mount Sinai, NY, USA

<sup>7</sup>The Tisch Cancer Institute, Icahn School of Medicine at Mount Sinai, NY USA

<sup>8</sup>Department of Medicine, Harvard Medical School, Boston, MA, USA

\*Corresponding author ([vlamincck@cornell.edu](mailto:vlamincck@cornell.edu))

### Abstract

Allogeneic hematopoietic cell transplantation (HCT) provides effective treatment for hematologic malignancies and immune disorders. Monitoring of post-transplant complications is critical, yet current diagnostic options are limited. Here, we show that cell-free DNA (cfDNA) in blood is a highly versatile analyte for monitoring of the most important complications that occur after HCT: graft-versus-host disease (GVHD), a frequent immune complication of HCT; infection; relapse of underlying disease; and graft failure. We demonstrate that these different therapeutic complications can be informed from a single assay, low-coverage bisulfite sequencing of cfDNA, followed by disease-specific bioinformatic analyses. To inform GVHD, we profile cfDNA methylation marks to trace the cfDNA tissues-of-origin and to quantify tissue-specific injury. To inform on infections, we implement metagenomic cfDNA profiling. To inform cancer relapse, we implement analyses of tumor-specific genomic aberrations. Finally, to detect graft failure we quantify the proportion of donor and recipient specific cfDNA. We applied this assay to 170 plasma samples collected from 27 HCT recipients at predetermined time points before and after allogeneic HCT. We found that the abundance of solid-organ derived cfDNA in the blood at one-month after HCT is an early predictor of acute graft-versus-host disease (area under the curve, 0.88). Metagenomic profiling of cfDNA revealed the frequent occurrence of viral reactivation in this patient population. The fraction of donor specific cfDNA was indicative of cell chimerism, relapse and remission, and the fraction of tumor specific cfDNA was informative of cancer relapse. This proof-of-principle study shows that cfDNA has the potential to improve the care of allogeneic HCT recipients by enabling earlier detection and better prediction of the complex array of complications that occur after HCT.

## 1 INTRODUCTION

2  
3 More than 30,000 patients undergo allogeneic hematopoietic cell transplants (HCT)  
4 worldwide each year for treatment of malignant and nonmalignant hematologic diseases<sup>1-3</sup>. Yet,  
5 myriad complications occur in this patient population. For example, up to 50% of patients  
6 experience graft-versus-host disease (GVHD), an immune response in which donor immune cells  
7 attack recipient tissues in the first year after transplantation<sup>2,4-6</sup>. Complications due to infection  
8 also occur frequently, mostly in the first year after transplantation, with bacterial and viral infection  
9 occurring in 52% and 57.9% of patients, respectively<sup>7,8</sup>. In addition, up to 50% of patients treated  
10 for malignant hematologic diseases suffer cancer relapse<sup>9,10</sup>. Last, graft failure is a major  
11 complication of HCT<sup>11-14</sup>.

12  
13 Patient monitoring for post-HCT complications relies on a complex combination of  
14 diagnostic assays. Early and accurate diagnosis of GVHD is critical to inform treatment decisions  
15 and to prevent serious long-term complications. Unfortunately, there are few, noninvasive  
16 diagnostic options that reliably identify patients early after the onset of GVHD symptoms: In  
17 current practice, diagnosis of GVHD relies primarily on clinical symptoms and requires  
18 confirmation with invasive procedures, such as biopsies of the gastrointestinal tract, skin, or  
19 liver<sup>15</sup>. Furthermore, there is a critical need for tools that can broadly and sensitively inform  
20 infection. A wide range of microorganisms can cause disease after HCT, and infection testing  
21 currently relies on a combination of bacterial culture that are slow and suffer from a high false  
22 negative rate, and viral PCRs which have limited multiplexity. To screen for cancer recurrence,  
23 the presence of cancer cells in the circulation is used as a prognostic marker for relapse and  
24 disease-free survival. Current monitoring options of minimal residual disease include flow-  
25 cytometry, and quantitative PCR. However, these technologies are insensitive to genetic and  
26 phenotypic changes<sup>16</sup>. Donor chimerism is currently used to quantify engraftment, relapse and  
27 graft loss, but relies on the analysis of living cells, and may not be sensitive to the high turnover  
28 rate of leukemic cells<sup>17</sup>.

29  
30 Here, we investigate the utility of circulating cell-free DNA as a versatile analyte to monitor HCT  
31 recipients after transplantation. Cell-free DNA in the blood of HCT recipients is a complex mixture  
32 of DNA from several sources: different tissues, microbes, donor cells and tumor cells<sup>18-20</sup> (**Fig.**  
33 **1A**). In this work, we demonstrate that a single assay, genome-wide methylation profiling of cell-  
34 free DNA, enables simultaneous monitoring of the major complications that arise after HCT. First,  
35 we show that methylation profiling by whole-genome bisulfite sequencing of cfDNA can be used  
36 to quantify the tissues-of-origin of cfDNA to thereby detect and quantify tissue injury due to GVHD  
37 after HCT. Second, we demonstrate the possibility to identify infectious agents via whole-genome  
38 bisulfite sequencing of cfDNA. Last, we show that the levels of donor- and tumor-derived cfDNA  
39 can inform engraftment, mixed chimerism, and cancer relapse. Together, this study provides a  
40 proof of principle that cfDNA profiling can be used to simultaneously monitor immune, cancer and  
41 infectious complications and treatment failure after allogeneic HCT.

## 42 43 RESULTS

44  
45 We performed a prospective cohort study to evaluate the utility of cfDNA to predict and  
46 monitor GVHD, infection, cancer relapse and treatment failure after allogeneic HCT. We selected  
47 27 adults that underwent allogeneic HCT and assayed a total of 170 serial plasma samples  
48 collected at seven predetermined time points, including before conditioning chemotherapy, on the  
49 day of but before hematopoietic cell infusion, after neutrophil engraftment (>500 neutrophils per  
50 microliter), and at one, two, three and six months post HCT (**Fig. 1B**). Additional samples were  
51 collected at the time of presentation of complications, such as symptoms of BK disease. The test

52 cohort included patients with both malignant (n=25) and non-malignant blood disorders (n=2) (**Fig.**  
 53 **1C, supplementary table 1**). Prior to conditioning, patient tumor cells were genotyped using a  
 54 targeted deep sequencing panel<sup>21</sup> (n = 20, total, 6 patients with copy number alterations). In total,  
 55 14 patients developed acute GVHD (GVHD+) and 13 did not (GVHD-), four patients experienced  
 56 graft failure, seven developed BK virus viremia, and five patients suffered cancer recurrence (**Fig.**  
 57 **1C, see Methods and SI**).

58  
 59 We isolated cfDNA from plasma (0.5 mL-1.9 mL per sample) and implemented whole-  
 60 genome bisulfite sequencing and bioinformatic analyses to profile epigenetic and genetic marks  
 61 within cfDNA that may inform the diverse complications that arise after HCT. We implemented a  
 62 single-stranded DNA (ssDNA) library preparation to obtain sequence information after bisulfite  
 63 conversion<sup>22,23</sup>. This ssDNA library preparation avoids degradation of adapter-bound molecules  
 64 which is common for WGBS library preparations that rely on ligation of methylated adapters  
 65 before bisulfite conversion and avoids amplification biases inherent to WGBS library preparations  
 66 that implement random priming<sup>24</sup>. We obtained  $39 \pm 14$  million paired-end reads per sample,  
 67 corresponding to  $0.96 \pm 0.4$  fold per-base human genome coverage and achieved a high bisulfite  
 68 conversion efficiency ( $99.4\% \pm 0.4\%$ ). We used paired-end read mapping to characterize the  
 69 length of bisulfite treated cfDNA at single-nucleotide resolution and to investigate potential  
 70 degradation of cfDNA due to bisulfite treatment. This analysis revealed a fragmentation profile  
 71 similar to the fragmentation profile previously reported for plasma cfDNA that was not subjected  
 72 to bisulfite treatment<sup>25</sup>. The mode of fragments longer than 100bp was  $165 \text{ bp} \pm 7 \text{ bp}$ , and Fourier  
 73 analysis revealed a 10.4 bp periodicity in the fragment length profile (**supplementary figure 1**).  
 74 A second peak at 60-90 bp in the fragment length profile is characteristic of single-stranded library  
 75 preparation methods and was reported previously<sup>22,26</sup>. Overall, we do not find evidence of  
 76 significant cfDNA fragmentation due to bisulfite treatment, in line with a recent report<sup>27</sup>.  
 77

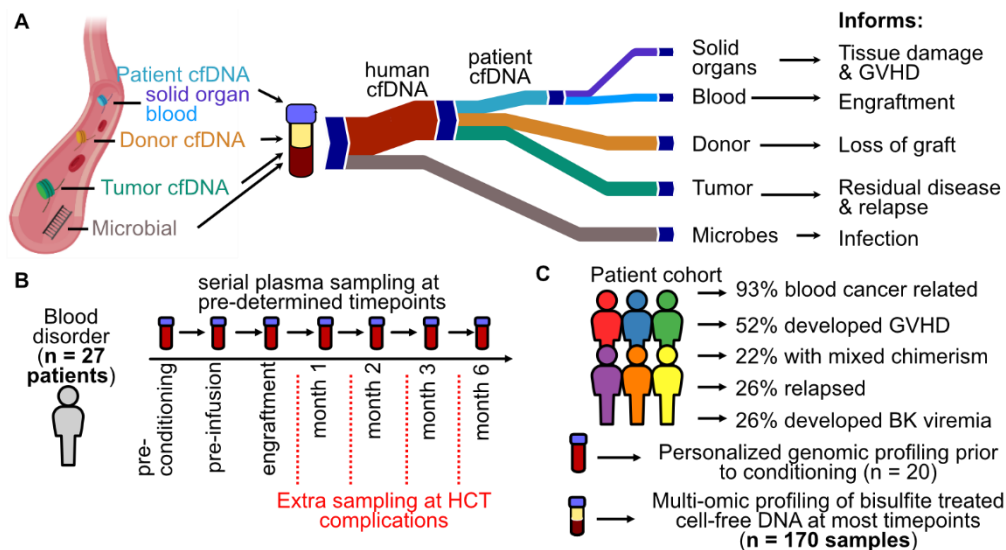

78  
 79 **Figure 1.** Study overview. **A** Cell-free DNA origins inform diverse transplant events and complications. **B**  
 80 Plasma from 27 HCT recipients was serially collected at 7 or more predetermined timepoints. **C** Patient  
 81 cohort characteristics.  
 82  
 83  
 84  
 85  
 86

## 87 **Temporal dynamics of cell-free DNA tissues-of-origin in response to conditioning therapy** 88 **and HCT**

89  
90 We first examined the utility of cfDNA tissues-of-origin by methylation profiling to identify  
91 organ injury due to GVHD after HCT in plasma samples obtained prior to the clinical diagnosis of  
92 GVHD. To quantify the relative proportion of cfDNA derived from different vascularized tissues  
93 and hematologic cell types we analyzed cfDNA methylation profiles against a reference set of  
94 methylation profiles of pure cell and tissue types<sup>28–32</sup> (samples with sequencing depth greater than  
95 0.1x, 138 reference tissues, see Methods, **Fig. 2A,B** and **supplementary dataset 1**). We  
96 computed the absolute concentration of tissue-specific cfDNA by multiplying the proportion of  
97 tissue-specific cfDNA with the concentration of total host-derived cfDNA (Methods). The most  
98 striking features seen in the data include: *i*) a decrease in blood-cell specific cfDNA in response  
99 to conditioning therapy performed to deplete the patient's hematopoietic cells (**Fig. 2C**), *ii*) an  
100 increase in total cfDNA concentration at engraftment (**Fig. 2D**), *iii*) a decrease in total cfDNA  
101 concentration after 180 days (**supplementary figure 2**), and *iv*) an association between tissue-  
102 specific cfDNA and the incidence of GVHD (see statistical analysis below).  
103

### 104 **Cell-free DNA tissues-of-origin by methylation profiling to monitor GVHD**

105  
106 We next examined these features in more detail to explore the utility of these  
107 measurements to monitor immune related complications of HCT. Prior to conditioning,  
108 neutrophils, erythrocyte progenitors and monocytes were the major contributors of cfDNA in  
109 plasma (22.0%, 12.0% and 11.7%, respectively, average cfDNA concentration 208 ± 280 ng/mL  
110 plasma). A variety of HCT conditioning regimens have been developed with varying degrees of  
111 organ toxicity and myelosuppression. Most patients in our cohort received reduced intensity  
112 conditioning therapy (RIC, n=25), whereas two patients received myeloablative conditioning  
113 therapy. Comparison of cfDNA tissues-of-origin in plasma before and after conditioning showed  
114 a significant drop in blood-derived cfDNA as expected from the function of the conditioning  
115 therapy (mean proportion of hematopoietic cell cfDNA decreased from 78% ± 8% to 55% ± 22%,  
116 p-value=9.6x10<sup>-5</sup>, **Fig. 2C**). The proportion of blood-derived cfDNA increased to 82% ± 11% at  
117 engraftment (p-value = 1.4x10<sup>-5</sup>, **Fig. 2C**). The most notable effect of stem cell infusion and  
118 engraftment was a significant increase in the absolute concentration of cfDNA (mean human-  
119 derived cfDNA concentration from 190 ng/mL on day of transplant to 1494 ng/mL at engraftment  
120 [p-value = 0.020], **Fig. 2D**).  
121

122 We next evaluated the performance of a cfDNA tissue-of-origin measurement to predict  
123 GVHD (**Fig. 2E**). We defined GVHD here as the clinical manifestation of any stage of the disease  
124 within the first 6 months post HCT (GVHD+, see Methods). We excluded samples collected after  
125 GVHD diagnosis, as these patients received additional GVHD treatment. We found that the  
126 concentration of solid-organ specific cfDNA was significantly elevated for patients in the GVHD+  
127 group at month 1, 2 and 3 (p-values of 0.0025, 0.0032, 0.0044, respectively), but not at the two  
128 pre-transplant time points (p = 0.71 prior to conditioning, and p = 0.84 prior to hematopoietic cell  
129 infusion) (**Fig. 2E**). Receiver operating characteristic analysis (ROC) of the performance of cfDNA  
130 as a predictive marker of GVHD yielded an area under the curve (AUC) of 0.88, 0.95 and 0.96 at  
131 engraftment and months 1, 2, and 3, respectively. These results support the notion that cfDNA  
132 predicts GVHD occurrence as early as one month after HCT (mean solid organ cfDNA of 872 and  
133 38 ng/mL plasma for GVHD+ and GVHD-, respectively; ROC AUC = 0.88, p-value = 0.0025) (**Fig.**  
134 **2E**).  
135

136 To evaluate the ability of this assay to pinpoint the site of GVHD, we quantified the burden  
137 of skin-derived cfDNA in the blood of GVHD negative individuals (n=13) and individuals who



138 developed cutaneous GVHD (n=12). We found that plasma samples from individuals with GVHD  
 139 had a higher burden of skin-derived cfDNA prior to clinical diagnosis of skin GVHD when  
 140 compared to samples from individuals who did not develop cutaneous GVHD (mean skin cfDNA  
 141 of 7.1 ng/mL plasma and 2.1 ng/mL plasma, respectively, p-value = 0.047 for samples collected  
 142 after engraftment and before clinical diagnosis, **supplementary figure 3**). The number of  
 143 samples from patients diagnosed with hepatic and gastrointestinal GVHD was insufficient to test  
 144 the performance of the assay to identify GVHD related injury to the liver or gut (n = 3 and n = 5,  
 145 respectively).  
 146  
 147

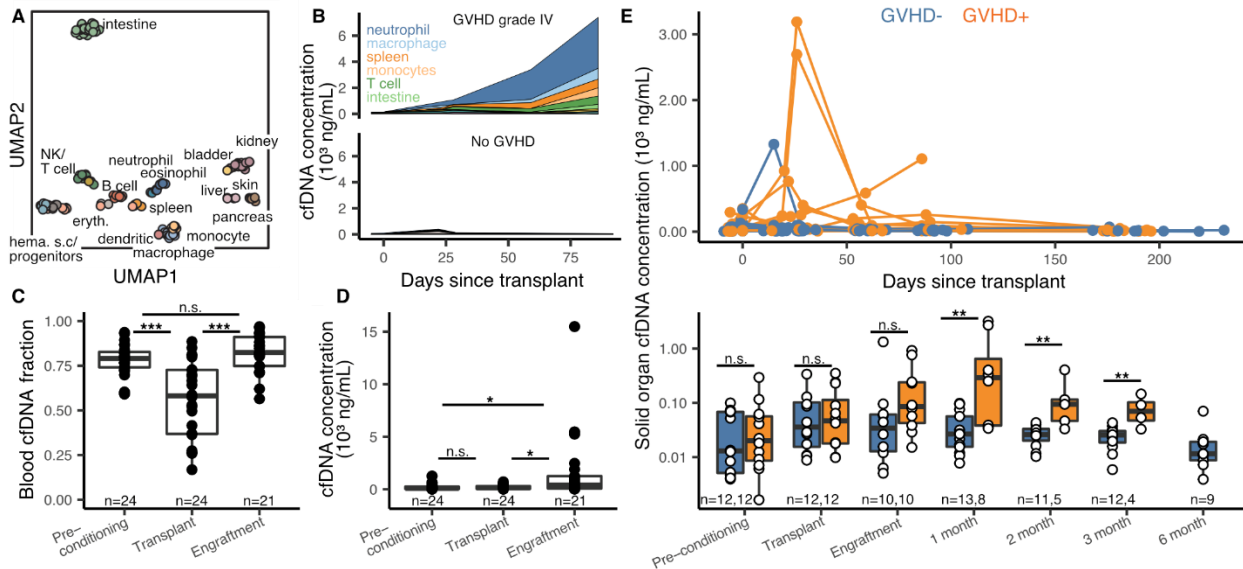

148 **Figure 2.** Host-derived cell-free DNA dynamics before and after HCT. **A** UMAP dimensional reduction of  
 149 cell and tissue methylation profiles. Individual tissues are colored by UMAP coordinates using a linear  
 150 gradient where each of the four corners is either cyan, magenta, yellow or black. **B** Examples of cfDNA  
 151 dynamics in the case of severe GVHD (patient 003, top) and no GVHD (patient 017, bottom) in the first 3  
 152 months post-transplant. **C, D** Effect of conditioning and HCT infusion on cfDNA composition (**C**) and  
 153 absolute concentration (**D**). **E** Solid-organ derived cfDNA concentration in plasma. Top: solid-organ cfDNA  
 154 and days post-transplant for each patient time point. Bottom: solid organ cfDNA by time point. Samples are  
 155 removed from analysis if plasma was collected after GVHD diagnosis. \* p-value < 0.05; \*\* p-value < 0.01;  
 156 \*\*\* p-value < 0.001  
 157

158  
 159 **Plasma virome screening after HCT**  
 160

161 cfDNA from microbes can be detected in the circulation, providing a means to screen for  
 162 infection via metagenomic cfDNA sequencing<sup>22,33–36</sup>. This may be a particularly powerful approach  
 163 in the context of HCT, given the high incidence of infectious complications, and the broad range  
 164 of microorganisms that can cause disease in HCT. To test this concept, we mined all cfDNA data  
 165 for microbial derived sequences. In a previous study, we found close agreement between the  
 166 abundance of organisms measured by shotgun sequencing of untreated and bisulfite-treated  
 167 cfDNA, confirming the possibility to perform metagenomic cfDNA sequencing by WGBS<sup>37</sup>. To  
 168 identify microbial-derived cfDNA after WGBS, we first identified and removed host related  
 169 sequences and we aligned the remaining unmapped reads to a set of microbial reference  
 170 genomes (0.2 ± 0.4% of total reads, Materials and Methods). We implemented a background  
 171 correction algorithm to remove contributions due to alignment noise and environmental

172 contamination and compared species abundances by the relative abundance of species reads to  
 173 human reads<sup>35,38</sup> (relative genomic equivalents [RGE]).

174  
 175 Using this procedure, we found a significant increase after HCT in the burden of cfDNA  
 176 derived from DNA viruses (DNA sequencing is not sensitive to RNA molecules, average RGE of  
 177 1.34 and 26.1, Pre-conditioning and month 3, respectively, p-value = 0.0090). Viruses from the  
 178 *Anelloviridae* family were the most abundant (463 occurrences of an *Anelloviridae* species). We  
 179 and others have reported a link between the abundance in plasma of *Anelloviridae* and the degree  
 180 of immunosuppression in transplantation<sup>39,40</sup>. In line with these observations, the increase in  
 181 cfDNA derived from DNA viruses was largely due to an increase in the burden of *Anelloviridae* in  
 182 the first months after HCT (**Fig. 3A**). *Herpesviridae* and *Polyomaviridae* frequently establish latent  
 183 infection in adults and may reactivate after allogeneic HCT<sup>41</sup>. We identified cfDNA from Human  
 184 *Herpesviridae* and *Polyomaviridae* in 100 of 170 samples from 26 of 27 patients (**Fig. 3B,C**).

185  
 186 BK Polyomavirus PCR tests are routinely performed in this patient population due to the  
 187 frequent complications related to BK Polyomavirus. We tested the sensitivity of the cfDNA assay  
 188 against a clinically validated BK Polyomavirus PCR screening test and found strong concordance  
 189 (sensitivity = 0.89, specificity = 0.96). For 4/6 discordant readouts, where the cfDNA test detected  
 190 BK polyomavirus and the PCR test did not, three were from a patient with clinically confirmed  
 191 reactivation of the virus in the urine (**Fig. 3D**). These findings demonstrate the possibility to  
 192 sensitively screen for infectious complications after HCT via cfDNA.

193  
 194

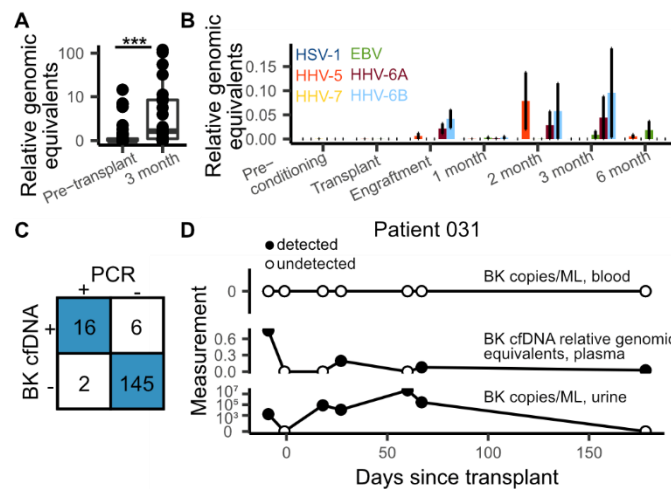

195  
 196 **Figure 3.** Infectome screening in HCT patients. **A** Relative genomic equivalents of Anelloviruses detected  
 197 before transplant (pre-conditioning and transplant timepoints) and the 3 month timepoint. **B** Relative  
 198 genomic equivalents of human herpesviruses by timepoint. Error bars represent standard error of the mean.  
 199 **C** Concordance between clinically validated BK PCR test (in blood) and BK cfDNA identification. **D** BK  
 200 abundances in blood (PCR test, top), plasma (cfDNA, middle) and urine (PCR test, bottom) in patient 031.  
 201

202 **Tumor-specific and donor-specific cell-free DNA inform cancer relapse and loss of**  
 203 **engraftment**

204  
 205 Many studies have established the utility of circulating tumor-specific cfDNA for early  
 206 cancer detection and monitoring of minimal residual disease. Here, we assessed the utility of  
 207 cfDNA profiling of cancer-associated copy number alterations (CNAs) as an approach to detect  
 208 the presence of leukemia-derived DNA in plasma. At the Dana-Farber Cancer Institute,  
 209 chromosomal aberrations related to malignant blood disorders are examined using a clinically-

210 validated, targeted, ultra-deep sequencing assay (pre transplant PBMC, n = 20 patients, Rapid  
211 Heme Panel, RHP<sup>21</sup>). Using RHP data, we identified six patients with CNAs. We next analyzed  
212 all cfDNA WGBS sequence data and found the cfDNA assay was able to detect leukemia-specific  
213 CNAs before transplant in two of these patients (**Fig. 4A-C**, patients 003 [mortality] and 031 [no  
214 mortality]). Relative copy number changes were used to estimate the fraction of cell-free  
215 originating from tumor cells (**Fig. 4B**, see Methods). Last, we found that the genome-wide cfDNA  
216 assay enabled detection of CNAs in regions not included in the Rapid Heme Panel (**Fig 4D**),  
217 underlining the importance of a genome-wide approach<sup>42</sup>.

218  
219 We highlight three cases that exemplify the utility of continuous patient monitoring. First,  
220 cfDNA monitoring for patient 031 detected new CNAs after HCT, suggesting the expansion of a  
221 subclonal tumor population over the course of treatment (**Fig. 4D, supplementary figure 4**). In  
222 this patient, we estimated tumor fractions of 90% at pre-conditioning, 23% at engraftment, and  
223 79% at month 6. Bone marrow biopsies performed 8.5 months after transplant (outside the  
224 timeframe of the current study) revealed hypocellular marrow consistent with acute myeloid  
225 leukemia. Second, profiling of patient 015 diagnosed with Philadelphia chromosome positive ALL  
226 (Ph+ALL) revealed the presence of monosomy 7 at engraftment and all subsequent time points  
227 (**Fig. 4E, supplementary figure 5**). Clinical chimerism testing based on short-tandem repeat  
228 PCR amplification for this same patient showed full engraftment of donor cells and bone marrow  
229 examination showed no evidence of leukemia relapse. Cytogenic analysis performed after  
230 transplant confirmed monosomy 7 in donor cells for this patient, highlighting the utility of an  
231 untargeted sequencing assay to identify rare transplantation events. Last, for patient 003 (**Fig.**  
232 **4F, supplementary figure 6**) who was diagnosed with severe GVHD (cutaneous stage 4, overall  
233 grade IV; unresolved; mortality day 91), cfDNA tissue-of-origin profiling revealed an increase in  
234 solid-organ derived cfDNA in addition to increasing tumor-derived cfDNA load (**Fig. 4F**),  
235 potentially pointing towards a joint graft-versus-host disease and relapse.  
236

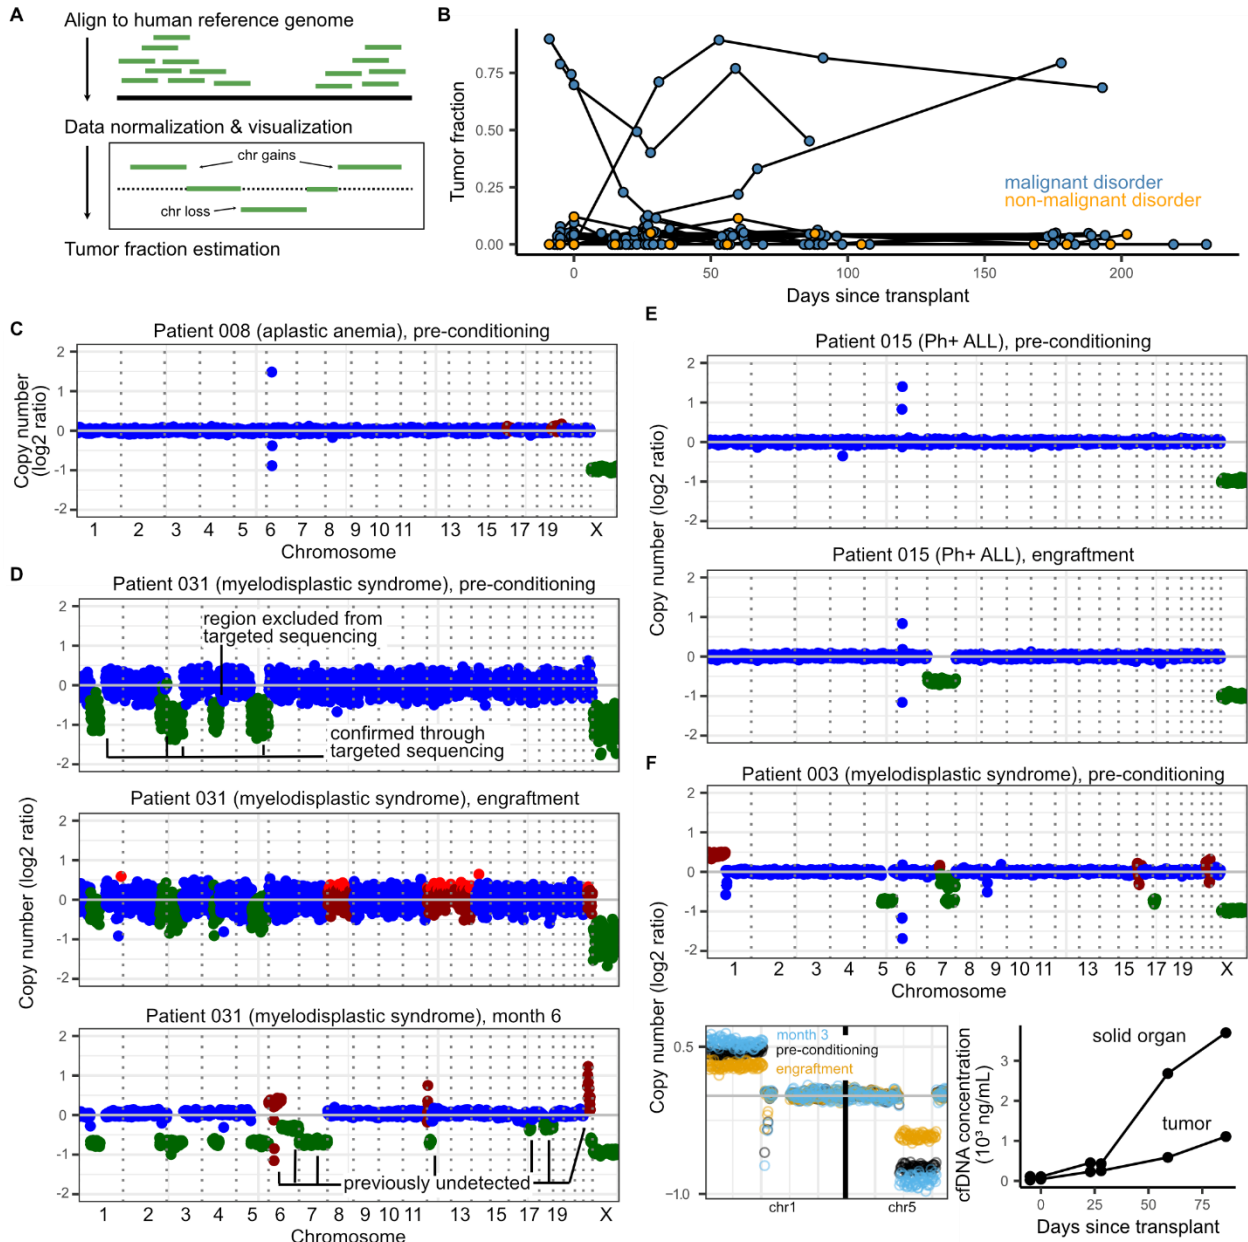

237  
 238 **Figure 4. A** Overview of tumor fraction estimation using copy number alterations. **B** Tumor fractions as  
 239 measured through ichorCNA at all collected timepoints. Patients without malignant disease and without  
 240 CNAs (as identified through targeted sequencing) were used to gauge the error in tumor fraction measured  
 241 by ichorCNA (up to 12%). **C** Example of a copy number alteration profile in a patient with a non-malignant  
 242 blood disorder (with no alterations expected). The few outliers in the coverage plot for patient 008 are likely  
 243 due to errors in sequence mapping. Genome-wide plots in C-F (top only in F) are colored by ichorCNA's  
 244 identification of a given region as neutral (blue), gained (red) or lost (green). **D-F** Copy number alteration  
 245 profiles of three patients with measurable copy number alteration-based tumor fractions. **D** Patient 015 was  
 246 found to have loss of chromosome 7 at the time of engraftment and in all subsequent samples. **E** Patient  
 247 031, over the course of their treatment, developed additional, clinically undetected structural variants. **F**  
 248 Patient 003 (deceased on day 91) had detectable tumor fraction and clinical evidence of GVHD. Solid-  
 249 organ derived cell-free DNA was higher than the tumor load (line plot, right-hand side). Top: genome-wide  
 250 coverage plot. Bottom left: copy number profiles on chromosomes 1 and 5 show a decrease in copy number  
 251 changes at engraftment (yellow) and subsequent increase at month 3 (blue), when compared to the pre-  
 252 conditioning timepoint (black). Bottom right: Tumor and solid organ derived cfDNA concentration at all



253 available timepoints for patient 003. Patients 003, 008, 015 and 031 were all male-male donor-recipient  
254 pairs.

255

## 256 Plasma donor-derived cfDNA as a marker of mixed chimerism

257

258 Measurements of donor-recipient chimerism are a routine part of clinical monitoring and can  
259 inform cancer relapse and loss the donor stem cell graft<sup>43,44</sup>. These measurements are performed  
260 on isolated hematopoietic cell populations and do not account for the turnover rate of cells, which  
261 are often higher in leukemic cells than in normal cells<sup>45</sup>. Therefore, it has been proposed that  
262 chimerism analysis of cfDNA may offer complimentary information to traditional cell-based  
263 chimerism analysis<sup>17,46</sup>. Here, we show the feasibility of measuring donor-derived cfDNA (dd-  
264 cfDNA) by leveraging the relative abundance of X and Y chromosomes in sex-mismatched  
265 recipient pairs (samples with depth of sequencing > 0.1x, **Fig. 5A**). We analyzed samples  
266 collected prior to transplantation to assess the error rate of this measurement (mean donor  
267 fraction 0.0% ± 4.6%). We found that the donor fraction is highest at engraftment (86% ± 13%)  
268 and remains constant in the absence of complications (**Fig. 5B, supplementary figure 7**). We  
269 highlight two examples from patients who experienced HCT complications (**Fig. 5C**). In Patient  
270 002 we observed a gradual decrease in dd-cfDNA after engraftment, with a sharp drop on day  
271 183. This patient developed disease relapse on day 152 and the gradual decreased in dd-cfDNA  
272 preceded relapse. Similarly, in patient 006, we observed a steady drop in dd-cfDNA after  
273 engraftment, prior to disease relapse on day 85. The fraction of dd-cfDNA for this patient  
274 subsequently increased at month six, before the patient entered remission (day 218). Taken  
275 together, these data suggest that dd-cfDNA is an informative biomarker for HCT monitoring and  
276 can be used in conjunction with other cfDNA features to inform levels of donor cell engraftment  
277 and quantification of residual recipient cells and relapse .

278

279

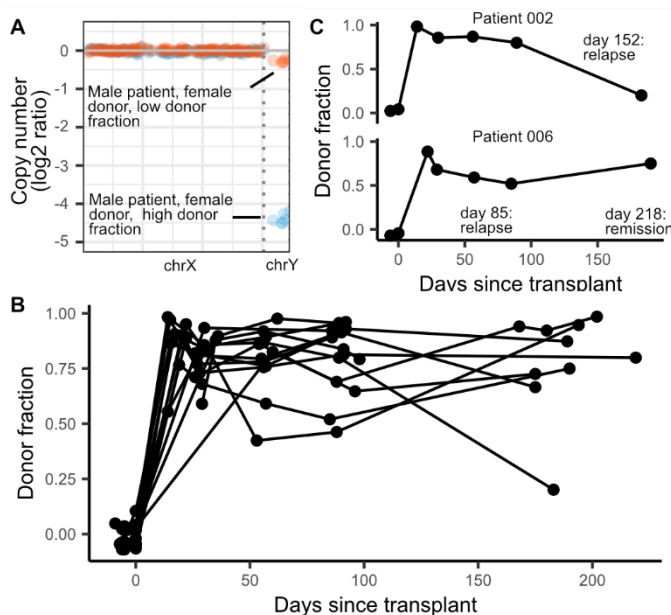

280 **Figure 5.** Donor fractions and days post-transplant in sex-mismatched patients. **A** The donor fraction is  
281 measured from the relative coverage of sex chromosomes (see Methods). **B** Donor fraction in all sex-  
282 mismatched patients. **C** Donor fraction in two patients who experienced disease relapse.

283

284

285

286

287 **DISCUSSION**

288

289 In this work, we have introduced a cfDNA assay with the potential to simultaneously screen  
290 for the most important complications that arise after allogeneic HCT. This work was inspired by  
291 recent studies that have shown that cfDNA is an analyte with utility in *i*) monitoring rejection after  
292 solid-organ transplantation<sup>47–50</sup>; *ii*) screening for infection and viral reactivation<sup>33,36,37</sup> and *iii*) early  
293 detection of cancer or relapse of disease<sup>42,51,52</sup>.

294

295 Numerous studies have demonstrated that donor derived cfDNA in the blood of solid-  
296 organ transplant recipients is a quantitative marker of solid-organ transplant injury<sup>48,49</sup> and a  
297 variety of commercial cfDNA assays are already in use<sup>47,53–56</sup>. We reasoned that cfDNA may also  
298 inform tissue injury due to GVHD after HCT. To quantify cfDNA derived from any tissue, we  
299 implemented bisulfite sequencing of cfDNA, to profile cytosine methylation marks which are  
300 comprised within cfDNA and are cell, tissue and organ type specific. We found that the burden of  
301 cfDNA from solid organs is predictive of the onset of GVHD as early as one month after HCT.  
302 Protein biomarkers have previously been investigated for diagnosis and prediction of GVHD<sup>57,58</sup>.  
303 ST2 and REG3 $\alpha$ , which both derive from the gastrointestinal tract, are two such biomarkers with  
304 the strongest predictive power. The cfDNA assay presented here has inherent advantages over  
305 these protein biomarker technologies. First, cfDNA may provide a generalizable approach to  
306 measure injury to any tissue, whereas protein injury markers may not be available for all cell and  
307 tissue types. Second, because the concentration of tissue-specific DNA can be directly related to  
308 the degree of cellular injury<sup>37,59–61</sup>, cfDNA may offer a measure of injury that can be trended over  
309 time.

310

311 Whole genome sequencing is not only responsive to human host-derived cfDNA, but also  
312 to microbial cfDNA in the blood circulation. Several recent studies have demonstrated the value  
313 of metagenomic cfDNA sequencing to screen for infection in a variety of clinical settings, including  
314 urinary tract infection<sup>33,37</sup>, sepsis<sup>36</sup>, and invasive fungal disease<sup>62</sup>. In HCT, metagenomic cfDNA  
315 sequencing has been used to identify pathogens in blood before clinical onset of bloodstream  
316 infections<sup>63</sup>. Here, we explored the potential to identify viral derived cfDNA in plasma of HCT  
317 recipients using whole genome bisulfite sequencing. This approach revealed the frequent  
318 presence of cfDNA from anelloviruses, cytomegalovirus, herpesvirus 6, Epstein-Barr virus and  
319 polyomavirus in the blood of HCT recipients. Anelloviruses were common in this cohort, and, while  
320 rarely pathogenic, can be used as a surrogate for the degree of immunosuppression in transplant  
321 patients<sup>39,40,64</sup>. We demonstrate sensitive detection of BK virus cfDNA for patients that were BK  
322 virus positive in blood, and for a patient that tested negative for BK virus in the blood, but tested  
323 positive for BK virus in the urine, which may indicate that the cfDNA assay reported here has a  
324 higher sensitivity than clinical PCR assays. The assay reported here has the potential to  
325 simultaneously inform about GVHD, from the tissues-of-origin of host cfDNA, and infection, from  
326 metagenomic analysis of microbial cfDNA. Compared to conventional metagenomic sequencing,  
327 this assay requires one additional experimental step to bisulfite convert cfDNA, which can be  
328 completed within approximately 2 hours and is compatible with multiple existing next-generation  
329 sequencing workflows.

330

331 Circulating tumor DNA has been shown to be a highly sensitive molecule for the detection  
332 of minimal residual disease<sup>42,65</sup>. The identification of solid-tumor derived circulating nucleic acids  
333 relies on the identification of single-nucleotide polymorphisms or copy number alterations<sup>51,66</sup>, or  
334 detection of changes in DNA fragmentation patterns<sup>52,67,68</sup>. In this work, we focused on structural  
335 variants of malignant disease to detect tumor-specific cfDNA and found evidence of subclonal  
336 expansion, newly acquired mutations, and simultaneous occurrence of GVHD and cancer  
337 relapse. Future studies where whole-genome sequencing is performed on the primary tumor cells

338 may uncover tumor-associated SNPs and be used in conjunction with CNA analysis to improve  
339 detection of circulating tumor DNA in malignant blood disease<sup>42</sup>.

340  
341 Donor-derived cells and, recently, dd-cfDNA have been explored as markers for GVHD,  
342 loss of graft and recurrence of disease<sup>19,46</sup>. We observed increased amounts of dd-cfDNA at  
343 engraftment, and these levels remained elevated in the absence of HCT complications. For  
344 patients that suffered relapse of disease, we observed a decrease in the burden of dd-cfDNA,  
345 potentially due to suppression of normal marrow cells by leukemic cells or increases in recipient  
346 tissue damage<sup>19,69</sup>. Studies by Duque-Afonso *et al* and Sharon *et al* reported elevated amounts  
347 of transplant recipient cfDNA in cases of GVHD, suggesting patient tissue contributions to the  
348 cell-free DNA mixture<sup>19,46</sup>. Interestingly, Duque-Afonso *et al* also observed increased recipient  
349 cfDNA at the time of relapse and progressive disease, suggesting that donor-derived (or recipient-  
350 derived) cfDNA alone may not be sufficient in distinguishing different important complications of  
351 HCT, supporting the need for an assay that is informative of the tissues-of-origin of cfDNA.

352  
353 This is a proof-of-principle study with several limitations that can be addressed in future  
354 work. First, the scope of the current study with 27 patients was not powered to detect any  
355 association of cfDNA with acute GVHD involving organs other than skin (liver, gut). Our results  
356 suggest that cfDNA tissue-of-origin profiling is predictive of acute GVHD, but larger studies will  
357 be needed to extend the current observations to other sites of organ damage, and to assess its  
358 utility in detecting and diagnosing chronic GVHD. In addition, larger studies, including patient  
359 populations with diverse HCT complications, are necessary to resolve the origins of cell-free DNA  
360 in cases of relapse of disease. Despite these potential limitations, we have shown here that cell-  
361 free DNA is a versatile analyte to monitor HCT patients, and our data highlights the importance  
362 of comprehensive monitoring all origins of cell-free DNA to assess the most severe complications  
363 of HCT.

364  
365

## 366 MATERIALS AND METHODS

367  
368 **Study cohort.** We performed a nested case-control study within a prospective cohort of adult  
369 patients undergoing allogeneic HCT at Dana-Farber Cancer Institute. Patients were followed for  
370 6 months after HCT. Patients were selected for this study on a rolling basis, and were placed in  
371 the GVHD case or control groups based on clinical manifestation of the disease within the first 6  
372 months after HCT. The study was approved by the Dana-Farber/Harvard Cancer Center's Office  
373 of Human Research Studies. All patients provided written informed consent.

374  
375 For this study, we used 170 blood samples collected from 27 allogeneic HCT recipients from  
376 August 2018- to August 2019. Baseline patient characteristics were recorded. Covariates of  
377 interest included HLA matching, donor relatedness and donor-recipient sex mismatch  
378 (**supplementary table 1**). Date of onset of GVHD, as well as GVHD prophylaxis and treatment  
379 regimens were documented. GVHD was diagnosed clinically and pathologically. GVHD severity  
380 was graded according to the Glucksberg criteria<sup>43</sup>. Other clinical events of interest included the  
381 development of bloodstream infections, BK polyomavirus disease, and clinical disease from other  
382 DNA viruses.

383  
384 **Time points.** Standard time points for plasma collection were determined prior to patient  
385 recruitment and included pre-conditioning (the day of their first conditioning dose, prior to  
386 receiving treatment), transplantation (the day of transplantation, prior to transfusion), engraftment  
387 (detailed below) and months 1, 2, 3 and 6 after transplant. In the event of BK-related symptoms,  
388 disease or reactivation, additional time points were collected. In the case of two time points

389 overlapping, the sample was preferentially labeled as engraftment, month 1, month 3, or month 6  
390 (in that order).

391  
392 **Engraftment.** Neutrophil engraftment was considered when blood samples contained an  
393 absolute neutrophil count greater or equal than 500 cell per microliter of blood on two separate  
394 measurements.

395  
396 **Relapse.** Disease relapse was defined through standard criteria for each underlying disease.  
397

398 **Mixed chimerism.** Mixed chimerism is broadly defined as 5-95% T cells of donor origin<sup>43</sup>. Here,  
399 we used a criteria of <75% T cells of donor origin to characterize mixed chimerism. Only  
400 timepoints obtained after engraftment were considered.

401  
402 **BK polyomavirus disease identification.** Patients were identified as BK virus disease positive  
403 when they presented BK-related urinary symptoms that correlated with positive BK qPCR test in  
404 either urine or blood (>10<sup>5</sup> copies/ mL in urine, >0 copies/mL in blood; Viracor BK qPCR test,  
405 reference #2500) and did not have evidence of any other cause of genitourinary pathology at the  
406 time of symptom onset.

407  
408 **Blood sample collection and plasma extraction.** Blood samples were collected through  
409 standard venipuncture in EDTA tubes (Becton Dickinson (BD), reference #366643) on admission,  
410 before the beginning of the conditioning chemotherapy; on the day of HCT after the completion  
411 of the conditioning chemotherapy, at engraftment (usually 14 to 21 days after HCT), and at months  
412 1, 2, 3 and 6 post-HCT. Plasma was extracted through blood centrifugation (2000rpm for 10  
413 minutes using a Beckman Coulter Allegra 6R centrifuge) and stored in 0.5-2mL aliquots at -80  
414 °C. Plasma samples were shipped from DFCI to Cornell University on dry ice.

415  
416 **Nucleic acid control preparation.** Synthetic oligos were prepared (IDT, **supplementary table**  
417 **2**), mixed in equal proportions, and diluted at approximately 150 ng/ul. At the time of cfDNA  
418 extraction, 8ul of control was added to 1992μL of 1xPBS and processed as a sample in all  
419 downstream experiments.

420  
421 **Cell-free DNA extraction.** cfDNA was extracted according to manufacturer recommendations  
422 (Qiagen Circulating Nucleic Acid Kit, reference #55114, elution volume 45μl). Eluted DNA was  
423 quantified using a Qubit 3.0 Fluorometer (using 2μL of eluted DNA). Measured cfDNA  
424 concentration was obtained using the following formula:

425  
426 
$$cfDNA\ concentration = \frac{(Eluted\ cfDNA\ concentration) * (Elution\ volume)}{(Plasma\ volume)}$$

427  
428 **Whole-genome bisulfite sequencing.** cfDNA and nucleic acid controls were bisulfite treated  
429 according to manufacturer recommendations (Zymo Methylation Lightning Kit, reference  
430 #D5030). Sequencing libraries were prepared using a previously described single-stranded library  
431 preparation protocol. Libraries were quality-controlled through DNA fragment analysis (Agilent  
432 Fragment analyzer) and sequenced on an Illumina NextSeq550 machine using 2x75bp reads.  
433 Nucleic acid controls were sequenced a ~1% of the total sequencing lane.

434  
435 **Human genome alignment.** Adapter sequences were trimmed using BBTools<sup>70</sup>. The Bismark  
436 alignment tool<sup>71</sup> was used to align reads to the human genome (version hg19), remove PCR  
437 duplicates and calculate methylation densities.

438

439 **Reference tissue methylation profiles and tissue of origin measurement.** Reference tissue  
440 methylomes were obtained from publicly available databases<sup>28–32</sup> (**supplementary dataset 1**).  
441 Genomic coordinates from different sources were normalized and converted to a standard 4  
442 column bed file (columns: chromosome, start, end, methylation fraction) using hg19 assembly  
443 coordinates. Methylation profiles were grouped by tissue-type and differentially methylated  
444 regions were found using Metilene<sup>72</sup>. Tissues and cell-types of origin were determined using  
445 quadratic programming as previously described<sup>37</sup>.

446  
447 **Donor fraction.** Donor fractions were calculated by measuring the relative coverage of X and Y  
448 chromosomes in sex-mismatched donor-recipient pairs. Coverage was summed across binned,  
449 500 base pair windows and adjusted for mappability and GC content using HMMcopy<sup>33,73</sup>.

450  
451 **Tumor fraction.** ichorCNA<sup>66</sup> (version 2.0) was used to detect copy number alterations and  
452 estimate tumor fraction in patients with cancer. A window size of 1MB along with a ploidy of (2,3)  
453 and a wide range of non-tumor restart fractions were used to calculate coverage on autosomal  
454 chromosomes. Coverage was normalized using a panel of normals generated from the plasma  
455 of 5 healthy donors (IRB XYZ). The plasma used for the panel of normals was processed using  
456 the same workflow as described above to account for experimental and sequencing artifacts. The  
457 normalized coverage profile for each sample was then used to detect copy number alterations  
458 and estimate tumor fraction.

459  
460 **Metagenomic alignment and quantification of microbial cfDNA.** After WGBS, reads were  
461 adapter-trimmed using BBTools<sup>70</sup>, and short reads are merged with FLASH<sup>74</sup>. Sequences were  
462 aligned to a C-to-T converted genome using Bismark<sup>71</sup>. Unmapped reads were BLASTed<sup>75</sup> using  
463 hs-blastn<sup>76</sup> to a list of C-to-T converted microbial reference genomes. A relative abundance of all  
464 detected organisms was determined using GRAMMy<sup>77</sup>, and relative genomic abundances are  
465 measured as previously described<sup>35</sup>. Microbial cfDNA fraction was calculated by dividing the  
466 unique number of reads mapping to microbial species (after adjusting for the length of each  
467 microbial genome in the reference set) to the total number of adapter-trimmed reads. Human  
468 fraction is estimated as 1 - microbial fraction. Microbial species were then filtered for  
469 environmental contamination and alignment noise using previously described methods<sup>38</sup>.

470 **cfDNA concentration.** cfDNA concentration of a specific tissue or microbe is calculated as  
471 follows:

472 
$$\text{Normalized cfDNA concentration}$$
$$= \frac{(\text{cfDNA concentration}) * (\text{Nucleic acid control input mass})}{\text{Nucleic acid control output mass}}$$

473  
474  
475 
$$\text{Tissue specific cfDNA concentration}$$
$$= (\text{Normalized cfDNA concentration}) * (\text{human read fraction})$$
$$* (\text{tissue proportion})$$

476  
477  
478  
479 
$$\text{Microbial cfDNA concentration}$$
$$= (\text{Normalized cfDNA concentration}) * (\text{microbial read fraction})$$

480  
481 **Depth of coverage.** The depth of sequencing was measured by summing the depth of coverage  
482 for each mapped base pair on the human genome after duplicate removal, and dividing by the  
483 total length of the human genome (hg19, without unknown bases).

484  
485



486 **Bisulfite conversion efficiency.** We estimated bisulfite conversion efficiency by quantifying the  
487 rate of C[A/T/C] methylation in human-aligned reads (using MethPipe<sup>78</sup>), which are rarely  
488 methylated in mammalian genomes.

489

490 **Statistical analysis.** Statistical analysis was performed in R (version 3.5). All tests were  
491 performed using a two-sided Wilcoxon test.

492

493 **Data availability.** The sequencing data generated for this study will be available in the database  
494 of Genotypes and Phenotypes (dbGaP). All code used to generate figures and analyze primary  
495 data will be made available on GitHub.

496

#### 497 **CONFLICTS OF INTEREST**

498 A.P.C., M.P.C., I.D.V., P.S.B. and J.R. have submitted patents related to the presented work.  
499 M.P.C. reports grants from McGill Interdisciplinary Initiative in Infection and Immunity, grants from  
500 Canadian Institutes of Health Research, during the conduct of the study; personal fees from  
501 GEn1E Lifesciences (as a member of the scientific advisory board), personal fees from nplex  
502 biosciences (as a member of the scientific advisory board), outside the submitted work. A.P.C.  
503 and I.D.V. are co-founders of Kanvas Biosciences and own equity in the company. I.D.V. is a  
504 member of the Scientific Advisory Board of Karius Inc. J.R. receives research funding from  
505 Amgen, Equillium, Kite/Gilead and Novartis and serves on Data Safety Monitoring Committees  
506 for AvroBio and Scientific Advisory Boards for Akron Biotech, Clade Therapeutics, Garuda  
507 Therapeutics, Immunitas Therapeutics, LifeVault Bio, Novartis, Rheos Medicines, Talaris  
508 Therapeutics and TScan Therapeutics.

509

#### 510 **AUTHOR CONTRIBUTIONS**

511 A.P.C., M.P.C., F.M.M., J.R. and I.D.V. designed the study. A.P.C. and J.S.L. performed  
512 experiments. M.P.C., F.M.M., J.R., K.C., K.M.T., J.L.O. and E.S. consented patients and acquired  
513 clinical data. A.P.C., C.J.L., S.S., M.P.C., P.B., I.D.V., F.M.M. and J.R. analyzed data. A.P.C.,  
514 M.P.C., I.D.V., F.M.M. and J.R. wrote the manuscript. All authors reviewed and approved the  
515 manuscript.

516

#### 517 **ACKNOWLEDGEMENTS**

518

519 We would like to express our gratitude and deepest respect for our co-author and colleague, Dr.  
520 Francisco M. Marty who passed away in April 2021. He was an Associate Professor in the  
521 Department of Medicine at the Brigham and Women's Hospital, Dana-Farber Cancer Institute and  
522 Harvard Medical School. Francisco had an unrivaled passion for patient care and clinical research  
523 focusing on the treatment of opportunistic infections in immunocompromised hosts. He was  
524 honored with numerous awards and recognitions for his contributions to teaching, clinical care,  
525 and rigorous scientific research during the course of his illustrious career. He was a great friend  
526 and mentor to many trainees and collaborators across the world. He will be dearly missed.

527

528 We would like to thank the Cornell Genomics Center for help with sequencing assays, the Cornell  
529 Bioinformatics facility for computational assistance, the Pasquarello Tissue bank at the Dana-  
530 Farber Cancer Institute for sample processing and cryopreservation and members of the De  
531 Vlaminck Lab for helpful discussions. We thank Francoise Vermeulen of the Cornell Statistical  
532 Consulting Unit for helpful discussion. This work was supported by R01AI146165 (to I.D.V., J.R.,  
533 M.P.C. and F.M.), R21AI133331 (to I.D.V.), R21AI124237 (to I.D.V.), DP2AI138242 (to I.D.V.), a  
534 National Sciences and Engineering Research Council of Canada fellowship PGS-D3 (to A.P.C)

## REFERENCES

1. Gratwohl, A. *et al.* Hematopoietic stem cell transplantation: a global perspective. *JAMA* **303**, 1617–1624 (2010).
2. McDonald-Hyman, C., Turka, L. A. & Blazar, B. R. Advances and challenges in immunotherapy for solid organ and hematopoietic stem cell transplantation. *Sci. Transl. Med.* **7**, 280rv2-280rv2 (2015).
3. Niederwieser, D. *et al.* Hematopoietic stem cell transplantation activity worldwide in 2012 and a SWOT analysis of the Worldwide Network for Blood and Marrow Transplantation Group including the global survey. *Bone Marrow Transplant.* **51**, 778–785 (2016).
4. Paczesny, S. Discovery and validation of graft-versus-host disease biomarkers. *Blood* **121**, 585–594 (2013).
5. Ferrara, J. L. M. & Deeg, H. J. Graft-versus-Host Disease. *N. Engl. J. Med.* **324**, 667–674 (1991).
6. Ferrara, J. L. M. & Chaudhry, M. S. GVHD: biology matters. *Blood Adv.* **2**, 3411–3417 (2018).
7. Schuster, M. G. *et al.* Infections in hematopoietic cell transplant recipients: Results from the organ transplant infection project, a multicenter, prospective, cohort study. *Open Forum Infect. Dis.* **4**, (2017).
8. Czyzewski, K. *et al.* Epidemiology, outcome and risk factors analysis of viral infections in children and adolescents undergoing hematopoietic cell transplantation: Antiviral drugs do not prevent Epstein–Barr virus reactivation. *Infect. Drug Resist.* **12**, 3893–3902 (2019).
9. Lee, J.-H. *et al.* Allogeneic hematopoietic cell transplantation for acute leukemia in first relapse or second remission. *Korean J. Hematol.* **45**, 95 (2010).
10. Mawad, R., Lionberger, J. M. & Pagel, J. M. Strategies to reduce relapse after allogeneic hematopoietic cell transplantation in acute myeloid leukemia. *Curr. Hematol. Malig. Rep.* **8**, 132–140 (2013).
11. Passweg, J. R. *et al.* Donor characteristics affecting graft failure, graft-versus-host disease, and survival after unrelated donor transplantation with reduced-intensity conditioning for hematologic malignancies. *Biol. Blood Marrow Transplant.* **17**, 1869–1873 (2011).
12. Satwani, P. *et al.* Transplantation-Related Mortality, Graft Failure, and Survival after Reduced-Toxicity Conditioning and Allogeneic Hematopoietic Stem Cell Transplantation in 100 Consecutive Pediatric Recipients. *Biol. Blood Marrow Transplant.* **19**, 552–561 (2013).
13. Davies, S. M. *et al.* Engraftment and survival after unrelated-donor bone marrow transplantation: A report from the national marrow donor program. *Blood* **96**, 4096–4102 (2000).
14. Gooley, T. A. *et al.* Reduced Mortality after Allogeneic Hematopoietic-Cell Transplantation. *N. Engl. J. Med.* **363**, 2091–2101 (2010).
15. Vogelsang, G. B., Lee, L. & Bensen-Kennedy, D. M. Pathogenesis and Treatment of Graft-Versus-Host Disease After Bone Marrow Transplant. *Annu. Rev. Med.* **54**, 29–52 (2003).
16. Jentzsch, M. *et al.* Clinical challenges and consequences of measurable residual disease in non-APL acute myeloid leukemia. *Cancers* **11**, (2019).
17. Aljurf, M. *et al.* Chimerism Analysis of Cell-Free DNA in Patients Treated with Hematopoietic Stem Cell Transplantation May Predict Early Relapse in Patients with Hematologic Malignancies. *Biotechnol. Res. Int.* **2016**, 1–6 (2016).
18. Buedts, L. & Vandenberghe, P. Circulating cell-free DNA in hematological malignancies. *Haematologica* **101**, 997–999 (2016).

19. Sharon, E. *et al.* Quantification of transplant-derived circulating cell-free DNA in absence of a donor genotype. *PLoS Comput. Biol.* **13**, e1005629–e1005629 (2017).
20. Camargo, J. F. *et al.* Next-generation sequencing of microbial cell-free DNA for rapid noninvasive diagnosis of infectious diseases in immunocompromised hosts. *F1000Research* **8**, (2020).
21. Kluk, M. J. *et al.* Validation and Implementation of a Custom Next-Generation Sequencing Clinical Assay for Hematologic Malignancies. *J. Mol. Diagnostics* **18**, 507–515 (2016).
22. Burnham, P. *et al.* Single-stranded DNA library preparation uncovers the origin and diversity of ultrashort cell-free DNA in plasma. *Sci. Rep.* **6**, 27859 (2016).
23. Gansauge, M.-T. & Meyer, M. Single-stranded DNA library preparation for the sequencing of ancient or damaged DNA. *Nat. Protoc.* **8**, 737–748 (2013).
24. Miura, F., Enomoto, Y., Dairiki, R. & Ito, T. Amplification-free whole-genome bisulfite sequencing by post-bisulfite adaptor tagging. *Nucleic Acids Res.* **40**, e136–e136 (2012).
25. Jiang, P. & Lo, Y. M. D. The Long and Short of Circulating Cell-Free DNA and the Ins and Outs of Molecular Diagnostics. *Trends Genet.* **32**, 360–371 (2016).
26. Snyder, M. W., Kircher, M., Hill, A. J., Daza, R. M. & Shendure, J. Cell-free DNA Comprises an In Vivo Nucleosome Footprint that Informs Its Tissues-Of-Origin. *Cell* **164**, 57–68 (2016).
27. Werner, B. *et al.* Circulating cell-free DNA from plasma undergoes less fragmentation during bisulfite treatment than genomic DNA due to low molecular weight. *PLoS One* **14**, e0224338–e0224338 (2019).
28. ENCODE Project Consortium. The ENCODE (ENCyclopedia Of DNA Elements) Project. *Science (80-. )*. **306**, 636–640 (2004).
29. Bujold, D. *et al.* The International Human Epigenome Consortium Data Portal. *Cell Syst.* **3**, 496-499.e2 (2016).
30. Albrecht, F., List, M., Bock, C. & Lengauer, T. DeepBlue epigenomic data server: programmatic data retrieval and analysis of epigenome region sets. *Nucleic Acids Res.* **44**, W581–W586 (2016).
31. Bernstein, B. E. *et al.* The NIH Roadmap Epigenomics Mapping Consortium. *Nat. Biotechnol.* **28**, 1045–1048 (2010).
32. Fernández, J. M. *et al.* The BLUEPRINT Data Analysis Portal. *Cell Syst.* **3**, 491-495.e5 (2016).
33. Burnham, P. *et al.* Urinary cell-free DNA is a versatile analyte for monitoring infections of the urinary tract. *Nat. Commun.* **9**, 2412 (2018).
34. Kowarsky, M. *et al.* Numerous uncharacterized and highly divergent microbes which colonize humans are revealed by circulating cell-free DNA. *Proc. Natl. Acad. Sci. U. S. A.* **114**, 9623–9628 (2017).
35. De Vlaminck, I. *et al.* Temporal response of the human virome to immunosuppression and antiviral therapy. *Cell* **155**, 1178–1187 (2013).
36. Blauwkamp, T. A. *et al.* Analytical and clinical validation of a microbial cell-free DNA sequencing test for infectious disease. *Nat. Microbiol.* **4**, 663–674 (2019).
37. Cheng, A. P. *et al.* A cell-free DNA metagenomic sequencing assay that integrates the host injury response to infection. *Proc. Natl. Acad. Sci.* **116**, 18738 LP – 18744 (2019).
38. Burnham, P. *et al.* Separating the signal from the noise in metagenomic cell-free DNA sequencing. (2020). doi:10.21203/rs.2.17385/v2
39. Tomblyn, M. *et al.* Guidelines for preventing infectious complications among hematopoietic cell transplantation recipients: a global perspective. *Biol. Blood Marrow Transplant.* **15**, 1143–1238 (2009).
40. Schmitz, J. *et al.* The Value of Torque Teno Virus (TTV) as a Marker for the Degree of Immunosuppression in Adult Patients after Hematopoietic Stem Cell Transplantation

- (HSCT). *Biol. Blood Marrow Transplant.* **26**, 643–650 (2020).
41. Marr, K. A. Delayed opportunistic infections in hematopoietic stem cell transplantation patients: a surmountable challenge. *Hematology* **2012**, 265–270 (2012).
  42. Zviran, A. *et al.* Genome-wide cell-free DNA mutational integration enables ultra-sensitive cancer monitoring. *Nat. Med.* **26**, 1114–1124 (2020).
  43. Baron, F. & Sandmaier, B. M. Chimerism and outcomes after allogeneic hematopoietic cell transplantation following nonmyeloablative conditioning. *Leukemia* **20**, 1690–1700 (2006).
  44. Olsson, R. *et al.* Graft failure in the modern era of allogeneic hematopoietic SCT. *Bone Marrow Transplantation* **48**, 537–543 (2013).
  45. Holyoake, T. L., Jiang, X., Drummond, M. W., Eaves, A. C. & Eaves, C. J. Elucidating critical mechanisms of deregulated stem cell turnover in the chronic phase of chronic myeloid leukemia. *Leukemia* **16**, 549–558 (2002).
  46. Duque-Afonso, J. *et al.* Cell-free DNA characteristics and chimerism analysis in patients after allogeneic cell transplantation. *Clin. Biochem.* **52**, 137–141 (2018).
  47. Sigdel, T. K. *et al.* A rapid noninvasive assay for the detection of renal transplant injury. *Transplantation* **96**, 97–101 (2013).
  48. De Vlaminck, I. *et al.* Circulating cell-free DNA enables noninvasive diagnosis of heart transplant rejection. *Sci. Transl. Med.* **6**, (2014).
  49. De Vlaminck, I. *et al.* Noninvasive monitoring of infection and rejection after lung transplantation. *Proc. Natl. Acad. Sci.* **112**, 13336–13341 (2015).
  50. Snyder, T. M., Khush, K. K., Valantine, H. A. & Quake, S. R. Universal noninvasive detection of solid organ transplant rejection. *Proc. Natl. Acad. Sci. U. S. A.* **108**, 6229–6234 (2011).
  51. Moulriere, F. *et al.* Detection of cell-free DNA fragmentation and copy number alterations in cerebrospinal fluid from glioma patients. *EMBO Mol. Med.* **10**, e9323 (2018).
  52. Moulriere, F. *et al.* High fragmentation characterizes tumour-derived circulating DNA. *PLoS One* **6**, (2011).
  53. Grskovic, M. *et al.* Validation of a Clinical-Grade Assay to Measure Donor-Derived Cell-Free DNA in Solid Organ Transplant Recipients. *J. Mol. Diagnostics* **18**, 890–902 (2016).
  54. Beck, J. *et al.* Digital Droplet PCR for Rapid Quantification of Donor DNA in the Circulation of Transplant Recipients as a Potential Universal Biomarker of Graft Injury. *Clin. Chem.* **59**, 1732–1741 (2013).
  55. Gielis, E. M. *et al.* Cell-Free DNA: An Upcoming Biomarker in Transplantation. *Am. J. Transplant.* **15**, 2541–2551 (2015).
  56. Knight, S. R., Thorne, A. & Lo Faro, M. L. Donor-specific Cell-free DNA as a Biomarker in Solid Organ Transplantation. A Systematic Review. *Transplantation* **103**, 273–283 (2019).
  57. Chen, Y.-B. & Cutler, C. S. Biomarkers for acute GVHD: can we predict the unpredictable? *Bone Marrow Transplant.* **48**, 755–760 (2012).
  58. Paczesny, S. *et al.* Three Biomarker Panel at Day 7 and 14 Can Predict Development of Grade II-IV Acute Graft-Versus-Host Disease. *Blood* **116**, 675 (2010).
  59. Sun, K. *et al.* Plasma DNA tissue mapping by genome-wide methylation sequencing for noninvasive prenatal, cancer, and transplantation assessments. *Proc. Natl. Acad. Sci. U. S. A.* **112**, E5503-12 (2015).
  60. Cheng, A. P. *et al.* Cell-free DNA tissues of origin by methylation profiling reveals significant cell, tissue, and organ-specific injury related to COVID-19 severity. *Med* **2**, 411-422.e5 (2021).
  61. Moss, J. *et al.* Comprehensive human cell-type methylation atlas reveals origins of circulating cell-free DNA in health and disease. *Nat. Commun.* **9**, 5068 (2018).
  62. Hong, D. K. *et al.* Liquid biopsy for infectious diseases: sequencing of cell-free plasma to



- detect pathogen DNA in patients with invasive fungal disease. *Diagn. Microbiol. Infect. Dis.* **92**, 210–213 (2018).
63. Goggin, K. P. *et al.* Evaluation of Plasma Microbial Cell-Free DNA Sequencing to Predict Bloodstream Infection in Pediatric Patients With Relapsed or Refractory Cancer. *JAMA Oncol.* **6**, 552–556 (2020).
  64. Lecuit, M. & Eloit, M. The human virome: New tools and concepts. *Trends in Microbiology* **21**, 510–515 (2013).
  65. Diehl, F. *et al.* Circulating mutant DNA to assess tumor dynamics. *Nat. Med.* **14**, 985–990 (2008).
  66. Adalsteinsson, V. A. *et al.* Scalable whole-exome sequencing of cell-free DNA reveals high concordance with metastatic tumors. *Nat. Commun.* **8**, 1–13 (2017).
  67. Mouliere, F. *et al.* Enhanced detection of circulating tumor DNA by fragment size analysis. *Sci. Transl. Med.* **10**, 4921 (2018).
  68. Cristiano, S. *et al.* Genome-wide cell-free DNA fragmentation in patients with cancer. *Nature* **570**, 385–389 (2019).
  69. Miraki-Moud, F. *et al.* Acute myeloid leukemia does not deplete normal hematopoietic stem cells but induces cytopenias by impeding their differentiation. *Proc. Natl. Acad. Sci. U. S. A.* **110**, 13576–13581 (2013).
  70. Bushnell, B., Rood, J. & Singer, E. BBMerge - Accurate paired shotgun read merging via overlap. *PLoS One* **12**, e0185056–e0185056 (2017).
  71. Krueger, F. & Andrews, S. R. Bismark: a flexible aligner and methylation caller for Bisulfite-Seq applications. *Bioinforma. Appl. NOTE* **27**, 1571–1572 (2011).
  72. Jühling, F. *et al.* metilene: fast and sensitive calling of differentially methylated regions from bisulfite sequencing data. *Genome Res.* **26**, 256–262 (2016).
  73. Ha, G. *et al.* Integrative analysis of genome-wide loss of heterozygosity and monoallelic expression at nucleotide resolution reveals disrupted pathways in triple-negative breast cancer. *Genome Res.* **22**, 1995–2007 (2012).
  74. Magoč, T. & Salzberg, S. L. FLASH: fast length adjustment of short reads to improve genome assemblies. *Bioinformatics* **27**, 2957–2963 (2011).
  75. Altschul, S. F., Gish, W., Miller, W., Myers, E. W. & Lipman, D. J. Basic local alignment search tool. *J. Mol. Biol.* **215**, 403–410 (1990).
  76. Chen, Y., Ye, W., Zhang, Y. & Xu, Y. High speed BLASTN: an accelerated MegaBLAST search tool. *Nucleic Acids Res.* **43**, 7762–7768 (2015).
  77. Xia, L. C., Cram, J. A., Chen, T., Fuhrman, J. A. & Sun, F. Accurate genome relative abundance estimation based on shotgun metagenomic reads. *PLoS One* **6**, e27992–e27992 (2011).
  78. Song, Q. *et al.* A reference methylome database and analysis pipeline to facilitate integrative and comparative epigenomics. *PLoS One* **8**, e81148–e81148 (2013).
